# Supplementary material for: A Deep Sequencing Strategy for Investigation of Virus Variants Within African Swine Fever Virus-infected Pigs
Source: Preprints.org preprint supplement (doi:10.20944/preprints202312.1299.v1), 2023-12-18
Supplement: Supplementary file 1 [file Pathogens - Supplementary - A deep sequencing strategy for investigation of virus variants within ASFV-infected pigs.xlsx]

## Sheet: Table S1
CHROM	POS	REF	ALT	FUNCTIONAL CLASS	HOMOPOLYMER	AMINO ACID CHANGE	CODON CHANGE	GENE NAME	Inoc	E1	E2	E4	E7	E8	E9	E10	E11	E12
MH681419.1	11870	C	T	MISSENSE	None	D213N	Gac/Aac	MGF_110-9L									0.0929
MH681419.1	11952	A	G	SILENT	None	P185	ccT/ccC	MGF_110-9L								0.0202
MH681419.1	33205	A	T	SILENT	None	L24	ctA/ctT	MGF_505-2R										0.0234
MH681419.1	33210	G	A	MISSENSE	None	R26Q	cGa/cAa	MGF_505-2R										0.024
MH681419.1	33212	T	C	SILENT	None	L27	Tta/Cta	MGF_505-2R										0.0241
MH681419.1	33319	G	A	SILENT	None	A62	gcG/gcA	MGF_505-2R	0.024	0.0572	0.0094	0.0377	0.0252	0.0604	0.0351	0.0594	0.0501	0.0603
MH681419.1	44769	A	G	SILENT	None	A62	gcA/gcG	MGF_505-10R	0.0068	0.0543	0.0146	0.0268	0.0481	0.0279	0.0216	0.0602	0.0282	0.0494
MH681419.1	117050	G	A	MISSENSE	None	P46S	Cct/Tct	CP123L								0.0646
MH681419.1	136624	C	T	SILENT	None	F588	ttC/ttT	NP868R				0.095
MH681419.1	137323	C	T	SILENT	None	H821	caC/caT	NP868R				0.051
MH681419.1	156198	A	T	MISSENSE	None	L265H	cTt/cAt	R298L						0.0851
MH681419.1	172451	A	G		None		2772		0.1301	0.1653	0.1719	0.1971	0.176	0.1657	0.1826	0.1608	0.1752	0.2134

## Sheet: Table S2
CHROM	POS	REF	ALT	FUNCTIONAL CLASS	HOMOPOLYMER	AMINO ACID CHANGE	Inoc	E2	B2	SP2	S2
MH681419.1	33319	G	A	SILENT	None	A62	0.024	0.0094	0.0213	0.018	0.0903
MH681419.1	36456	A	G	MISSENSE	None	M216V					0.0258
MH681419.1	44736	G	C	SILENT	None	L51				0.0041	0.0383
MH681419.1	117360	C	G	SILENT	None	G2454					0.034
MH681419.1	125958	G	A	SILENT	None	P173					0.0393
MH681419.1	144036	T	C	SILENT	None	E109					0.1003
MH681419.1	144569	G	A	MISSENSE	None	G51R					0.0218
MH681419.1	146850	T	C	MISSENSE	None	S47P			0.0343		0.0752
MH681419.1	172451	A	G		None		0.1301	0.1719	0.1892	0.2176	0.204

## Sheet: Table S3
CHROM	POS	REF	ALT	INDEL	INDEL SIZE	EFFECT	HOMOPOLYMER	AMINO ACID CHANGE	Inoc	E1	E2	E4	E7	E8	E9	E10	E11	E12
MH681419.1	424	ACCCCC	A	D	5	upstream_gene	Homopolymer											0.7701
MH681419.1	424	ACCCCCC	A	D	6	upstream_gene	Homopolymer					0.6822
MH681419.1	8724	ACAAAG	A	D	5	frameshift	None	LC142				0.0237						0.0178
MH681419.1	10468	GAAGAA	G	D	5	upstream_gene	Homopolymer										0.0209
MH681419.1	16880	CGGGGGG	C	D	6	upstream_gene	Homopolymer							0.7188
MH681419.1	33362	TGGAAG	T	D	5	frameshift	None	WK77	0.0208	0.0145	0.0021		0.0175	0.0191	0.0136	0.016	0.027	0.0163
MH681419.1	59517	GGGGGT	G	D	5	frameshift	Homopolymer	GV43									0.0247	0.0246
MH681419.1	61359	GTGTCA	G	D	5	frameshift	None	HDT553				0.0256				0.0069		0.0049
MH681419.1	62455	CCTGGGGG	C	D	7	frameshift	Homopolymer	DPQ187								0.0298
MH681419.1	65214	TTTTGC	T	D	5	upstream_gene	Homopolymer			0.0174	0.0081						0.0234
MH681419.1	69772	GCTGCC	G	D	5	frameshift	Homopolymer	GS165	0.0313	0.0189
MH681419.1	70661	TGGCGGG	T	D	6	inframe	Homopolymer	GG9		0.0225	0.0098	0.013
MH681419.1	81644	AAAAAT	A	D	5	upstream_gene	Homopolymer					0.0207			0.0214	0.0135
MH681419.1	81994	TTTACC	T	D	5	upstream_gene	Homopolymer						0.0246				0.0167	0.0135
MH681419.1	82198	TGGCTC	T	D	5	frameshift	None	WL29				0.0214
MH681419.1	83946	CGAAAA	C	D	5	frameshift	Homopolymer	EK612	0.0359			0.0378		0.0397	0.0378	0.0383		0.0423
MH681419.1	85015	TTTTTTC	T	D	6	inframe	Homopolymer	RKK246K	0.0071	0.0074			0.0144		0.0174	0.0204	0.0093
MH681419.1	85921	TGGCCA	T	D	5	frameshift	None	LA413			0.0319	0.0578				0.0701		0.0538
MH681419.1	86708	TAGCCC	T	D	5	frameshift	None	GL151									0.0269
MH681419.1	86709	AGCCCG	A	D	5	frameshift	None	AGL150		0.0259	0.0112	0.0172		0.0091	0.0154	0.0194		0.0145
MH681419.1	89232	CAGCAA	C	D	5	frameshift	Homopolymer	SK44					0.0248				0.0208
MH681419.1	93148	TTTTCG	T	D	5	frameshift	Homopolymer	CEK622	0.0128	0.0163		0.0198			0.0153	0.0225
MH681419.1	93567	CACAAT	C	D	5	frameshift	None	IV483		0.0095							0.0242
MH681419.1	93795	TCTCCC	T	D	5	frameshift	None	GR407		0.0396			0.0575
MH681419.1	97770	TAGAAG	T	D	5	frameshift	None	SS97	0.0139	0.012							0.0206
MH681419.1	100990	TAAAGG	T	D	5	frameshift	None	SF439							0.0348	0.0421	0.0382
MH681419.1	107972	TTTTTTTC	T	D	7	frameshift	Homopolymer	EKK40	0.0094				0.0258			0.0197	0.0301
MH681419.1	109868	CGGGAA	C	D	5	frameshift	None	LP1096								0.0212
MH681419.1	112741	AAAAAG	A	D	5	frameshift	Homopolymer	FFF138	0.0743					0.0629		0.0791
MH681419.1	114258	CTCCTT	C	D	5	frameshift	Homopolymer	SF354							0.0252		0.0257
MH681419.1	114788	ACTTTT	A	D	5	frameshift	Homopolymer	NFS530									0.0204
MH681419.1	115012	GAGAAA	G	D	5	frameshift	Homopolymer	EK605		0.0621
MH681419.1	116239	GAAATTA	G	D	6	inframe	Homopolymer	EIK1014E									0.0417
MH681419.1	116281	GAATTT	G	D	5	frameshift	Homopolymer	EF1028			0.031
MH681419.1	122457	GTTAGA	G	D	5	frameshift	None	SN754									0.052
MH681419.1	139760	TGAAAA	T	D	5	frameshift	Homopolymer	FS161					0.027
MH681419.1	141628	ATCCCCC	A	D	6	inframe	Homopolymer	EGD715D				0.0238		0.0265		0.0402	0.0191
MH681419.1	142291	AAAGGGG	A	D	6	inframe	Homopolymer	APF494A			0.0193						0.0232
MH681419.1	148332	CAAAAT	C	D	5	frameshift	None	KM256		0.0034		0.0221				0.0208
MH681419.1	150168	CATTTT	C	D	5	frameshift	Homopolymer	IL868		0.0205		0.0185	0.0114			0.0133	0.0163	0.0132
MH681419.1	153554	AAGGCC	A	D	5	frameshift	None	EGQ104				0.0228		0.0155			0.0223
MH681419.1	154448	AAATTC	A	D	5	frameshift	Homopolymer	NS59									0.0276
MH681419.1	156594	ATTATT	A	D	5	frameshift	Homopolymer	KII131								0.0428
MH681419.1	157321	CTCTTT	C	D	5	frameshift	Homopolymer	EKS587						0.025				0.0229
MH681419.1	158292	GTAGCT	G	D	5	frameshift	None	SY264	0.018									0.0211
MH681419.1	158618	CCGCCT	C	D	5	frameshift	Homopolymer	KA155						0.0228				0.014
MH681419.1	158918	CCGAAA	C	D	5	frameshift	Homopolymer	FS55	0.016	0.0283		0.0213		0.0262	0.0234	0.0215	0.0232	0.0295
MH681419.1	167679	TCTTTTA	T	D	6	inframe	None	VFY217V					0.0205
MH681419.1	170815	CCCCTTT	C	D	6	inframe	Homopolymer	PLS60P	0.0278	0.0353	0.0193	0.0469	0.0576	0.0315	0.0367	0.0389	0.0246	0.0262
MH681419.1	172423	G	GTATATAGGAA	I	10	upstream_gene	Tandem_repeat		0.4358	0.4987	0.5114	0.5545	0.5321	0.5353	0.5331	0.535	0.5244	0.5474
MH681419.1	173665	TTTTTGCC	T	D	7	upstream_gene	Homopolymer							0.0203				0.0354
MH681419.1	173666	TTTTGCC	T	D	6	upstream_gene	Homopolymer								0.0247	0.0296
MH681419.1	173667	TTTGCC	T	D	5	upstream_gene	Homopolymer						0.0662

## Sheet: Table S4
CHROM	POS	REF	ALT	INDEL	INDEL SIZE	EFFECT	HOMOPOLYMER	AMINO ACID CHANGE	Inoc	E2	B2	SP2	S2
MH681419.1	866	TACCCC	T	D	5	frameshift	Homopolymer	GV274				0.0293
MH681419.1	36540	TTCTTC	T	D	5	frameshift	Homopolymer	FF244			0.0234
MH681419.1	69772	GCTGCC	G	D	5	frameshift	Homopolymer	GS165	0.0313			0.01
MH681419.1	83946	CGAAAA	C	D	5	frameshift	Homopolymer	EK612	0.0359				0.0181
MH681419.1	85921	TGGCCA	T	D	5	frameshift	None	LA413		0.0319
MH681419.1	102747	TTTTTA	T	D	5	frameshift	Homopolymer	LFK128				0.0264
MH681419.1	112741	AAAAAG	A	D	5	frameshift	Homopolymer	FFF138	0.0743
MH681419.1	116281	GAATTT	G	D	5	frameshift	Homopolymer	EF1028		0.031	0.0252
MH681419.1	170815	CCCCTTT	C	D	6	inframe	Homopolymer	PLS60P	0.0278	0.0193	0.0243	0.0162	0.0182
MH681419.1	172423	G	GTATATAGGAA	I	10	upstream_gene	Tandem_repeat		0.4358	0.5114	0.585	0.5658	0.5733
